# Supplementary material for: The Nexus between Entrepreneurial Education and Entrepreneurial Self-Competencies: A Social Enterprise Perspective
Source: MDPI journal article supplement (doi:10.3390/su141912725), 2022-10-06
Supplement: s1 [file s1]

## QUESTIONNAIRE FOR THE STUDY

### Measures for **Entrepreneurial Education**

The following statements describe your assessment of entrepreneurial education offered by your current institution. On a scale of 1-5, where 1-strongly disagree, 2-disagree, 3-somewhat agree, 4-agree, and 5-strongly agree, show the extent to which you agree or disagree to the statements

| No | Statement                                                                                                                                                                                | 1 | 2 | 3 | 4 | 5 |
|----|------------------------------------------------------------------------------------------------------------------------------------------------------------------------------------------|---|---|---|---|---|
| 1  | I have learnt methods to generate basic business ideas                                                                                                                                   |   |   |   |   |   |
| 2  | The entrepreneurial course enhanced my ability to better perceive business opportunities in my environment                                                                               |   |   |   |   |   |
| 3  | The entrepreneurship programme enabled me to identify the characteristics of successful entrepreneurs (e.g. risk taking, proactivity, innovativeness etc.)                               |   |   |   |   |   |
| 4. | I have developed an understanding of the different sources I can obtain funding to start a new business                                                                                  |   |   |   |   |   |
| 5. | I have developed the ability to relate previously unrelated objects to produce novel outcomes                                                                                            |   |   |   |   |   |
| 6. | I have developed skills to access resources I do not necessarily own or control to accomplish personal ends                                                                              |   |   |   |   |   |
| 7. | I have developed the capacity to take advantage of my surroundings, employ unconventional cost tactics not recognized by others, and do more with less                                   |   |   |   |   |   |
| 8. | I have developed the capability of creating new products, services, and business models that generate revenues exceeding their costs and produce sufficient benefits about a fair return |   |   |   |   |   |

### Measures for **Student Satisfaction**

The following statements describe your assessment of your satisfaction level regarding the entrepreneurship education programme offered by your current institution. On a scale of 1-5, where 1-strongly disagree, 2-disagree, 3-somewhat agree, 4-agree, and 5-strongly agree, show whether you agree or disagree to the statements

| No | Statement                                                                                                  | 1 | 2 | 3 | 4 | 5 |
|----|------------------------------------------------------------------------------------------------------------|---|---|---|---|---|
| 1  | I am satisfied with the quality of the employment skills gained during my education                        |   |   |   |   |   |
| 2  | I am satisfied with the quality of my assessments during my studies                                        |   |   |   |   |   |
| 3  | I am satisfied with the workshops and seminars provided during my studies                                  |   |   |   |   |   |
| 4  | I am satisfied with the entrepreneurship opportunities in this programme to help me explore business ideas |   |   |   |   |   |

|    |                                                                                |  |  |  |  |  |
|----|--------------------------------------------------------------------------------|--|--|--|--|--|
| 5. | The Staff have made the entrepreneurship education interesting                 |  |  |  |  |  |
| 6. | I consider the time and money spent in obtaining the qualifications good value |  |  |  |  |  |
| 7  | Overall, I am satisfied with the quality of the teaching during my studies     |  |  |  |  |  |

#### Measures for **Entrepreneurial self-efficacy**

The following statements describe your own assessment of your entrepreneurial self-efficacy level, having gone through the entrepreneurship programme in your current institution. On a scale of 1-5, where 1-strongly disagree, 2-disagree, 3-somewhat agree, 4-agree, and 5-strongly agree, show the extent to which you agree or disagree to the statements

| No | Statement                                                                                                                                   | 1 | 2 | 3 | 4 | 5 |
|----|---------------------------------------------------------------------------------------------------------------------------------------------|---|---|---|---|---|
| 1  | I have developed the ability to maintain a sense of self-confidence regarding one's ability to accomplish a particular task                 |   |   |   |   |   |
| 2  | I have developed social interaction skills that enable me to establish, develop and main sets of relationships with others who work with me |   |   |   |   |   |
| 3  | I believe I can create new products and find new opportunities to have a solid foundation to launch a venture                               |   |   |   |   |   |
| 4  | I believe I can encourage others and my team members to try a new idea or take innovative action                                            |   |   |   |   |   |
| 5  | I believe I can sources of funding for my start-up                                                                                          |   |   |   |   |   |
| 6  | I believe in my vision and that I can maintain it, and clarify it to my team members and investors                                          |   |   |   |   |   |
| 7  | I believe I can tolerate and deal with ambiguity and uncertainty in my start-up enterprise                                                  |   |   |   |   |   |

#### Measures for **Entrepreneurial self-competencies**

The following statements describe your own assessment of your entrepreneurial self-competencies level, having gone through the current entrepreneurship programme in your current institution. On a scale of 1-5, where 1-strongly disagree, 2-disagree, 3-somewhat agree, 4-agree, and 5-strongly agree, show the extent to which you agree or disagree to the statements

| No | Statement | 1 | 2 | 3 | 4 | 5 |
|----|-----------|---|---|---|---|---|
|----|-----------|---|---|---|---|---|

|    |                                                                     |  |  |  |  |  |
|----|---------------------------------------------------------------------|--|--|--|--|--|
| 1  | I have developed the necessary competencies for effective team work |  |  |  |  |  |
| 2  | I have developed valuable problem solving skills                    |  |  |  |  |  |
| 3  | I have developed effective English writing and speaking skills      |  |  |  |  |  |
| 4  | I have developed sound numeracy skills                              |  |  |  |  |  |
| 5. | I have developed a positive attitude towards work                   |  |  |  |  |  |
| 6. | I have developed a good sense of social and global awareness        |  |  |  |  |  |
| 7. | I have developed effective digital and ICT skills                   |  |  |  |  |  |
| 8. | I have now become an effective collaborator                         |  |  |  |  |  |
